# Supplementary material
Source: publisher site journal article supplement (https://www.dovepress.com/article/273045)
Supplement: Supplementary file 1 [file get_supplementary_file.php]

## Supplementary data

## Conceptual framework

**Paternal factors**

- Age
- Religion
- Educational status
- Employment status
- Number of newborn
- Family income
- Substance use
- History of depression
- Experience of being a father

**Relationship factors**

- Family set up
- Relationship with parents
- Friend support
- Marital status
- Marital relation
- Family support
- Number of wife
- Relative mental illness

**Infant and environmental related factors**

- Place of wife after delivery
- Accommodation
- Pregnancy planned/unplanned
- Attend antenatal check up
- Mode of delivery
- Attend delivery of your baby
- GA of the pregnancy
- Congenital birth problems
- Place of health care
- Infant sleeping problem
- History of loss of child

Figure 1 Conceptual frame work.

Source, Adapted from different literatures ([4](#_ENREF_4), [13](#_ENREF_13), [34](#_ENREF_34), [37](#_ENREF_37), [44](#_ENREF_44))

## Sample size and sampling techniques

The required sample size of eligible participants for the study was determined by using a single population proportion formula**.**

**Therefore:-**

**n = (Z** **α/2)2 P (1-P)**

**d2**

Where, n= the desired sample size

Z α/2= is standardized normal distribution value for the 95% CI =1.96

d= was the margin of error to be tolerated (5%)

P= by considering 50%, since prevalence of PPPD in Ethiopia is not known.

**n= (1.96)2 0.5(1-0.5)**

**(0.05)2**

**n= 384**

None response rate 10%, there for the total sample size was **423**

## Sampling procedure

The total numbers of public health centers (HC) in Wolaita Zone was 73. From these three of them had no postnatal follow up figure in the previous month report. From the rest, 25 HCs were selected by lottery method. The study subjects were allocated proportionally to each health center according to the previous month (March) clients follow up record in postnatal care unit and the study subject from selected health center was selected by systematic random sampling method. The first father was selected by lottery method and the others were selected every two.

- To know the proportional sample=>

The average population to each HC *Total sample size (423) divided by total clients attending the selected (25) HC (828)

Wadu HC= 33*423 =🡺 17 fathers

828

Ganame HC= 15*423 =8 fathers

828

Humbo Tebela HC = 30*423==🡺 15 fathers

828

Gununo HC= 50*423= 26 fathers

828

Sodo HC= 90*423====🡺46 fathers

828

Bitena HC = 35*423 ==🡺 18 fathers

828

Badesa HC = 40*423=🡺 20 fathers

828

Areka HC= 30*423 ====🡺 15 fathers

828

Edo HC= 35*423=====🡺 18 fathers

828

Sake HC= 35*423=====🡺 18 fathers

828

Girara HC= 30*423 ====🡺 15 fathers

828

Buge HC= 25*423 ==🡺13 fathers

828

Boditi HC = 60*423 ==🡺 31 fathers

828

Dalbo HC = 8*423 ==🡺4 fathers

828

Bale HC= 90*423====🡺46 fathers

828

Koyo HC= 30*423 ====🡺 15 fathers

828

Shanto HC= 32*423= 16 fathers

828

Dendo W HC= 20*423 =🡺 10 fathers

828

Oydu Chama HC= 15*423 =8 fathers

828

Bilate Chericho HC = 15*423 =8 fathers

828

Bombe HC= 15*423 =8 fathers

828

Tome Gerera HC= 18*423 ===🡺 9 fathers

828

Bakulo Segno HC = 31*423 ====🡺16 fathers

828

Gasuba HC = 20*423 =🡺 10 fathers

828

Abaya HC= 26*423 =====🡺13 fathers

828

Key; HC = Health centers in Wolaita Zone.

## Annex I- English version information sheet

Participant information sheet.

Good morning/afternoon, my name is_________ and I am one of the data collector for the study being conducted by Mesfin and Aseb, on a topic entitled “Prevalence and associated factors of paternal postpartum depression among fathers who come to postnatal follow up clinic with their partner in selected public health centers of Wolaita Zone, Ethiopia, 2019”. For this study, you are selected as a participant and before getting your consent to participate in the study, all the necessary information that you need to know related to the study is stated as follows;

**Objective**: to Prevalence and associated factors of paternal postpartum depression among fathers who come to postnatal follow up clinic with their partner in selected public health centers of Wolaita Zone, Ethiopia, 2019.

**Significance of the study**: The study can be useful in adding the knowledge on the regarding level of depression father with the new born. It also important to design training for health care providers who are giving care and support for postnatal clinics. This study can be used as a reference for other researchers to do further study on the topic area. This questionnaire might take 10 -15 minutes. Your name will not be written anywhere in the study and all the information you give us is confidential except for the purposes of this study and it will never be disclosed for the third parity. In addition, I would like to inform you that by participating in this study, you will get no short term or long term risk or benefit. I also would like to inform you that you have a full right to withdraw from the study at any time. Your cooperation and willingness to participate for the study is very helpful.

## Annex II- Consent

Questionnaire Prepared to Assess Prevalence and Associated Factors of Depression among male partner who Come to Postnatal Clinic with Their Partner in Selected Wolaita Zone Public Health Centers, Ethiopia, 2019.

**Consent**

My name is ---------------------------------- I am data collector of study being conducted by Mesfin and Aseb. They are conducting a study to determine prevalence and associated factors with depression among fathers who come to PP clinic with their partner. If you decide to participate in the study, you will be asked some questions on the questionnaire below.

Any information you provide will be kept confidential. Your name will not appear on the questionnaire. Any information you provide will not be used against you. Your responses will not bring any harm to you and will not affect your job.

You are free to choose whether or not you to participate in the study.

**Do you agree in this study?**

Yes No

**Thank you for Your Cooperation!**

Name of the Interviewer _____________Signature _______date _______

Name of the supervisor ______________Signature _______date ______

**Questions related to Prevalence and associated factors of paternal postpartum depression**

Facility code_________ Date: _______

**Paternal socio demographic and related characteristics**

| S no. | Questions | Response option | Code |
| --- | --- | --- | --- |
| 101 | Male partner’s age in years | ------------------ |  |
| 102 | Newborn’s age in days | ------------------ |  |
| 103 | Number of children in household | ------------------ |  |
| 104 | What is your Religion? | 1. Orthodox Christian 2. Protestant 3. Muslim   Other (specify... |  |
| 105 | What is the father’s educational status; | 1. No formal education 2. Read and write 3. Completed primary education 4. Completed secondary education 5. Completed higher education |  |
| 106 | Number of newborn babies | 1. single 2. Twin 3. Other (specify... |  |
| 107 | Father’s employment status (Are you currently employed | 1. Employed 2. Unemployed 3. Other (specify.. | Skip to 110 If unemployed |
| 108 | Employment status if employed | 1. Permanent 2. Temporary |  |
| 109 | If employed are you received paternal leave | 1. Yes 2. No |  |
| 110 | How much your average family income in Birr? | ------ |  |
| 111 | Are you comfortable to your family income? | 1. Yes 2. No |  |
| 112 | Residence | 1. urban 2. rural |  |
| 113 | Your housing / accommodation condition. | 1. your own home 2. rental home 3. Other (specify... |  |
| 114 | Did you currently use any kind of substance? | 1. Yes 2. No | If no Skip to Ques No. 116 |
| 115 | If you are using substance specify (cigarette, alcohol ….) | ………… |  |
|  |  |  |  |
| 116 | Did you have known history of Depression | 1. yes 2. No |  |

**Part II- Relationship and related characteristics**

| 201 | What is your family setup? | 1. Nuclear family 2. Joint family |  |
| --- | --- | --- | --- |
| 202 | Did you have a good relationship with your parents? | 1. YES 2. No |  |
| 203 | Did you have support of friends? | 1. Yes 2. No |  |
| 204 | Did you have the support of family? | 1. Yes 2. No |  |
| 205 | Have any of your close relatives been diagnosed with mental illness or depression (mother, father, brother, or sister)? | 1. yes 2. No |  |
| 206 | Marital status | 1. Married: living together 2. Married: living separately 3. Unmarried 4. Other (specify... |  |
| 207 | How money wife did you have | 1. One 2. More than one |  |
| 208 | Did you think your marital relationship good? | 1. Yes 2. No |  |

**PART III- Infant and environmental related factors**

| 301 | Did your wife go to her mother’s house post-delivery? | 1. Yes 2. No |  |
| --- | --- | --- | --- |
| 302 | Was this pregnancy planned? | 1. Yes 2. No |  |
| 303 | Did you attend antenatal checkups with your wife | 1. Yes 2. No |  |
| 304 | What was the mode of delivery? | 1. Vaginal delivery 2. Cesarean section |  |
| 305 | Did you attend the delivery of your child?  (Present during delivery of your baby) | 1. Yes 2. No |  |
| 306 | Gestational age at delivery | 1. Preterm 2. term 3. post term |  |
| 307 | Has your newborn child been diagnosed with any of congenital birth problems | 1. yes 2. no | If no skip to ques. 309 |
| 308 | If there is congenital birth problem specify it | ---------- |  |
| 309 | Place of health care | 1. governmental 2. private |  |
| 310 | Did your infant has Infant sleep problem | 1. yes 2. No |  |
| 311 | Had you ever lost a child before the birth of this child? | 1. yes 2. no |  |

**Part IV Part EPDS (Edinburgh postnatal depression scale)**
